# Supplementary material for: Rationale and design of the CV-PREVITAL study: an Italian multiple cohort randomised controlled trial investigating innovative digital strategies in primary cardiovascular prevention
Source: PubMed Central journal article supplement — BMJ Open. 2023 Jul 14;13(7):e072040. doi: 10.1136/bmjopen-2023-072040 (PMC10351259; doi:10.1136/bmjopen-2023-072040), 2023-07-14
Supplement: bmjopen-2023-072040supp002.pdf [file bmjopen-2023-072040supp002.pdf]

**Online Supplemental file 2. SPIRIT Item 2b: All items from the World Health Organization Trial Registration Data Set**

| <b>Data category</b>                          | <b>Information</b>                                                                                                                                                                                                                                                                                                                                                                                                                       |
|-----------------------------------------------|------------------------------------------------------------------------------------------------------------------------------------------------------------------------------------------------------------------------------------------------------------------------------------------------------------------------------------------------------------------------------------------------------------------------------------------|
| Primary registry and trial identifying number | ClinicalTrials.gov NCT05339841                                                                                                                                                                                                                                                                                                                                                                                                           |
| Date of registration in primary registry      | 21 April, 2022                                                                                                                                                                                                                                                                                                                                                                                                                           |
| Secondary identifying numbers                 | R1256/20-CCM 1319; RCR-2019-23669116_001                                                                                                                                                                                                                                                                                                                                                                                                 |
| Source(s) of monetary or material support     | Italian Ministry of Health                                                                                                                                                                                                                                                                                                                                                                                                               |
| Primary sponsor                               | Monzino Cardiology Center IRCCS                                                                                                                                                                                                                                                                                                                                                                                                          |
| Secondary sponsor(s)                          | none                                                                                                                                                                                                                                                                                                                                                                                                                                     |
| Contact for public queries                    | Damiano Baldassarre ( <a href="mailto:damiano.baldassarre@cardiologicomonzino.it">damiano.baldassarre@cardiologicomonzino.it</a> );<br>Roberta Baetta ( <a href="mailto:roberta.baetta@cardiologicomonzino.it">roberta.baetta@cardiologicomonzino.it</a> )                                                                                                                                                                               |
| Contact for scientific queries                | Principal Investigators:<br>Giulio Pompilio, Centro Cardiologico Monzino IRCCS ( <a href="mailto:giulio.pompilio@cardiologicomonzino.it">giulio.pompilio@cardiologicomonzino.it</a> );<br>Gianfranco Parati, Istituto Auxologico Italiano IRCCS ( <a href="mailto:parati@auxologico.it">parati@auxologico.it</a> )<br>Scientific contact: <a href="mailto:studiocvprevital@retecardiologica.it">studiocvprevital@retecardiologica.it</a> |
| Public title                                  | Italian Digital Primary Cardiovascular Prevention Study (CV-PREVITAL)                                                                                                                                                                                                                                                                                                                                                                    |
| Scientific title                              | Digital Strategies in Primary Cardiovascular Prevention in the Italian Population                                                                                                                                                                                                                                                                                                                                                        |
| Countries of recruitment                      | Italy                                                                                                                                                                                                                                                                                                                                                                                                                                    |
| Health condition(s) or problem(s) studied     | Subjects in primary cardiovascular prevention                                                                                                                                                                                                                                                                                                                                                                                            |
| Intervention(s)                               | Intervention group: subjects assigned to a mobile health application (mHealth) app that delivers a personalized digital health support program based on periodic messages with advice, motivational reminders and support to improve lifestyle habits and risk factor control                                                                                                                                                            |
|                                               | Control group: subjects assigned to usual care                                                                                                                                                                                                                                                                                                                                                                                           |
| Key inclusion and exclusion criteria          | Ages eligible for study: $\geq 45$ years; Sexes eligible for study: both;<br>Accepts healthy volunteers: yes                                                                                                                                                                                                                                                                                                                             |
|                                               | Inclusion criteria: adult subjects ( $\geq 45$ years) consenting to participate in the study and using a smartphone                                                                                                                                                                                                                                                                                                                      |
|                                               | Exclusion criteria: current or previous cardiovascular disease (personal history of myocardial infarction, angina pectoris, arterial revascularization procedures, stroke, transient ischemic attack, peripheral artery disease); Psychiatric disorders; Participation in other clinical trials                                                                                                                                          |
| Study type                                    | Interventional (mobile health application vs usual care)                                                                                                                                                                                                                                                                                                                                                                                 |
|                                               | Allocation: randomized;                                                                                                                                                                                                                                                                                                                                                                                                                  |
|                                               | Intervention model: parallel assignment;<br>Masking: none (Open Label);                                                                                                                                                                                                                                                                                                                                                                  |

|                         |                                                                                                                                                                                                                                                                                                                                                                                                                                                                                                                                                                                                                                                                                                                                                                                                                                                                                                                                                                                                                                                                                                                                                                                                                                                                                                                                                                                                                                                                                                                                                                                                                                                                                                                                                                           |
|-------------------------|---------------------------------------------------------------------------------------------------------------------------------------------------------------------------------------------------------------------------------------------------------------------------------------------------------------------------------------------------------------------------------------------------------------------------------------------------------------------------------------------------------------------------------------------------------------------------------------------------------------------------------------------------------------------------------------------------------------------------------------------------------------------------------------------------------------------------------------------------------------------------------------------------------------------------------------------------------------------------------------------------------------------------------------------------------------------------------------------------------------------------------------------------------------------------------------------------------------------------------------------------------------------------------------------------------------------------------------------------------------------------------------------------------------------------------------------------------------------------------------------------------------------------------------------------------------------------------------------------------------------------------------------------------------------------------------------------------------------------------------------------------------------------|
|                         | Primary purpose: cardiovascular disease prevention                                                                                                                                                                                                                                                                                                                                                                                                                                                                                                                                                                                                                                                                                                                                                                                                                                                                                                                                                                                                                                                                                                                                                                                                                                                                                                                                                                                                                                                                                                                                                                                                                                                                                                                        |
|                         | Phase: not applicable                                                                                                                                                                                                                                                                                                                                                                                                                                                                                                                                                                                                                                                                                                                                                                                                                                                                                                                                                                                                                                                                                                                                                                                                                                                                                                                                                                                                                                                                                                                                                                                                                                                                                                                                                     |
| Date of first enrolment | June 10, 2022                                                                                                                                                                                                                                                                                                                                                                                                                                                                                                                                                                                                                                                                                                                                                                                                                                                                                                                                                                                                                                                                                                                                                                                                                                                                                                                                                                                                                                                                                                                                                                                                                                                                                                                                                             |
| Target sample size      | 82,800                                                                                                                                                                                                                                                                                                                                                                                                                                                                                                                                                                                                                                                                                                                                                                                                                                                                                                                                                                                                                                                                                                                                                                                                                                                                                                                                                                                                                                                                                                                                                                                                                                                                                                                                                                    |
| Recruitment status      | Recruiting                                                                                                                                                                                                                                                                                                                                                                                                                                                                                                                                                                                                                                                                                                                                                                                                                                                                                                                                                                                                                                                                                                                                                                                                                                                                                                                                                                                                                                                                                                                                                                                                                                                                                                                                                                |
| Primary outcome(s)      | <ul style="list-style-type: none"> <li>• Short term (month 12): change in cardiovascular risk</li> <li>• Long term (year 7): between groups difference in the incidence of vascular events</li> </ul>                                                                                                                                                                                                                                                                                                                                                                                                                                                                                                                                                                                                                                                                                                                                                                                                                                                                                                                                                                                                                                                                                                                                                                                                                                                                                                                                                                                                                                                                                                                                                                     |
| Key secondary outcomes  | <ul style="list-style-type: none"> <li>• Change of a combined endpoint including hypertension, diabetes, hypercholesterolemia [month 12]</li> <li>• Systolic and diastolic blood pressure (mmHg) [month 12]</li> <li>• HDL-C, LDL-C, and triglycerides (mg/dL) [month 12]</li> <li>• HbA1c (%) [month 12]</li> <li>• Body weight (kg) [month 12]</li> <li>• Physical activity (IPAQ questionnaire) [month 12]</li> <li>• Mediterranean diet adherence (PREDIMED questionnaire) [month 12]</li> <li>• Mediterranean diet adherence (Moli-Sani questionnaire) [month 12]</li> <li>• Smoking status [month 12]</li> <li>• Alcohol intake [month 12]</li> <li>• Salt intake (MiniSal questionnaire) [month 12]</li> <li>• Stress (Perceived Stress Scale; PSS) [month 12]</li> <li>• Psychological distress (PHQ 4 questionnaire) [month 12]</li> <li>• Anxiety (PHQ 4 questionnaire) [month 12]</li> <li>• Depression (PHQ 4 questionnaire) [month 12]</li> <li>• Multidimensional Health Locus of Control Scale (MHLCS) - Internality [month 12]</li> <li>• Multidimensional Health Locus of Control Scale (MHLCS) - Powerful Others Externality [month 12]</li> <li>• Multidimensional Health Locus of Control Scale (MHLCS) - Chance Externality [month 12]</li> <li>• General Self Efficacy (GSE Scale) [month 12]</li> <li>• Risk propensity (RPS Scale) [month 12]</li> <li>• Sleep quality (Pittsburgh Sleep Quality Index) [month 12]</li> <li>• Subjects' adherence to data recording [month 12]</li> <li>• Interruptions in the use of the mHealth App [month 12]</li> <li>• Adherence to recommended therapies [month 12]</li> <li>• Cost/effectiveness of intervention [year 7]</li> <li>• House ownership as socioeconomic status indicator [year 7]</li> </ul> |

|  |                                                                                                                                                                                                                                                                                                                                                                                                                                                                                                                                                                                                                                                                                                                                                                                                                                            |
|--|--------------------------------------------------------------------------------------------------------------------------------------------------------------------------------------------------------------------------------------------------------------------------------------------------------------------------------------------------------------------------------------------------------------------------------------------------------------------------------------------------------------------------------------------------------------------------------------------------------------------------------------------------------------------------------------------------------------------------------------------------------------------------------------------------------------------------------------------|
|  | <ul style="list-style-type: none"><li>• Type of residence as socioeconomic status indicator [year 7]</li><li>• Education as socioeconomic status indicator [year 7]</li><li>• Employment status as socioeconomic status indicator [year 7]</li><li>• Type of profession as socioeconomic status indicator [year 7]</li><li>• Severe acute respiratory syndrome coronavirus 2 (SARS-CoV-2) - history of hospitalization (questionnaire) [year 7]</li><li>• Severe acute respiratory syndrome coronavirus 2 (SARS-CoV-2) - history of symptoms (questionnaire) [year 7]</li><li>• Severe acute respiratory syndrome coronavirus 2 (SARS-CoV-2) - history of asymptomatic disease (questionnaire) [year 7]</li><li>• Severe acute respiratory syndrome coronavirus 2 (SARS-CoV-2) - history of vaccination (questionnaire) [year 7]</li></ul> |
|--|--------------------------------------------------------------------------------------------------------------------------------------------------------------------------------------------------------------------------------------------------------------------------------------------------------------------------------------------------------------------------------------------------------------------------------------------------------------------------------------------------------------------------------------------------------------------------------------------------------------------------------------------------------------------------------------------------------------------------------------------------------------------------------------------------------------------------------------------|
