# Supplementary material for: Rationale and design of the CV-PREVITAL study: an Italian multiple cohort randomised controlled trial investigating innovative digital strategies in primary cardiovascular prevention
Source: PubMed Central journal article supplement — BMJ Open. 2023 Jul 14;13(7):e072040. doi: 10.1136/bmjopen-2023-072040 (PMC10351259; doi:10.1136/bmjopen-2023-072040), 2023-07-14
Supplement: bmjopen-2023-072040supp003.pdf [file bmjopen-2023-072040supp003.pdf]

**Online Supplemental file 3 - Informed consent materials  
(Italian and English version)**

Studio CV PREVITAL Versione 2.0 del 31.05.2021

**MODULO DI INFORMAZIONE PER IL PAZIENTE****Studio CV PREVITAL****Strategie di Prevenzione primaria cardiovascolare nella popolazione italiana****Invito a partecipare allo studio CV PREVITAL**

Gentile Signora/e la invitiamo a partecipare alla Ricerca CV PREVITAL.

**Cos'è lo studio CV PREVITAL?**

Lo studio CV PREVITAL è una ricerca collaborativa condotta da Medici di Famiglia, che si svolge a livello nazionale con l'obiettivo di migliorare la prevenzione primaria cardiovascolare in Italia.

Lo studio CV PREVITAL è promosso dal Ministero della Salute che riconosce nella prevenzione l'arma più efficace per ridurre l'insorgenza delle malattie cardiovascolari.

**Perché è importante lo studio CV PREVITAL?**

Attualmente, la prevenzione rappresenta la strategia più importante di intervento per diminuire l'incidenza di malattie cardiovascolari quali l'infarto del miocardio e l'ictus cerebrale. Identificare precocemente i soggetti a rischio di sviluppare queste malattie, e informare adeguatamente le persone interessate su come adottare stili di vita "sani" si sono dimostrate strategie molto efficaci per contrastare l'insorgenza di ipertensione, di diabete e di ipercolesterolemia che insieme al fumo e all'obesità rappresentano i principali fattori di rischio per l'insorgenza delle malattie cardiovascolari. In questo contesto le tecnologie digitali stanno dimostrando un grande potenziale nel miglioramento della salute pubblica ed individuale, in quanto possono essere utilizzati come strumenti di supporto al medico per la gestione dei fattori di rischio.

Infatti negli ultimi anni si sta diffondendo sempre di più l'espressione "mobile-health" o "m-health", con cui si indica l'insieme di tecnologie (cellulari e smartphone, tablet, dispositivi digitali) applicate in ambito medico-sanitario, che stanno dimostrando un grande potenziale nel miglioramento della salute pubblica ed individuale.

**Obiettivo dello studio**

L'obiettivo dello studio è quello di valutare l'efficacia di un intervento di m-health nella riduzione dei principali fattori di rischio cardiovascolari e nell'insorgenza a lungo termine delle principali malattie cardiovascolari. L'intervento consiste nell'uso di un'applicazione, scaricabile sul proprio smartphone, che invierà dei messaggi educativi e formativi personalizzati, e permetterà il monitoraggio e l'auto-controllo dei principali fattori di rischio cardiovascolari e degli stili di vita.

**In che cosa consiste lo studio**

Lo studio coinvolgerà circa 250 Medici di Famiglia, distribuiti in diverse regioni di Italia e in totale verranno inclusi 50.000 soggetti.

Il suo medico verificherà che lei abbia i requisiti per partecipare allo studio e in caso positivo la inviterà ad aderire allo stesso firmando il consenso allegato.

Studio CV PREVITAL  
Versione 2.0 del 31.05.2021

Lo studio CV PREVITAL è uno studio clinico randomizzato non farmacologico, dove i medici partecipanti saranno divisi casualmente in due gruppi:

1. gruppo di controllo
2. gruppo di intervento

I medici del “gruppo di controllo” gestiranno i propri pazienti secondo la normale pratica clinica (usual care), al meglio delle conoscenze attualmente disponibili.

I medici del “gruppo di intervento”, in aggiunta a quanto previsto dalla normale pratica clinica, seguiranno i pazienti anche avvalendosi del supporto di una App che i partecipanti potranno scaricare sul proprio smartphone attraverso un link dedicato.

Lo studio clinico randomizzato è il metodo più appropriato, scientificamente riconosciuto, per poter valutare l'efficacia di interventi volti a modificare una condizione clinica. Nel caso del presente studio, l'uso della App per migliorare il controllo dei fattori di rischio cardiovascolare.

### **Che cosa comporta l'adesione allo studio CV PREVITAL?**

Se dovesse decidere di partecipare a questo studio, il suo medico Le proporrà una serie di domande volte a valutare lo stato della sua salute cardiovascolare. In particolare sarà invitato a compilare, con l'aiuto di personale infermieristico e/o di tutorial digitali, alcuni questionari riguardanti le abitudini alimentari, l'attività fisica, l'abitudine al fumo e fattori psico-sociali e comportamentali. Le saranno inoltre misurati i livelli di colesterolo totale, LDL, HDL e l'emoglobina glicata mediante una goccia di sangue ottenuta grazie ad un prelievo capillare (piccola puntura sul dito). Infine, saranno effettuate le misurazioni di pressione arteriosa, peso, altezza e circonferenza vita. Il tutto sarà ripetuto dopo 12 mesi.

Il suo medico e il personale infermieristico La seguiranno mettendo in atto tutte le conoscenze disponibili per migliorare il suo profilo di rischio cardiovascolare. Se il suo medico fa parte del gruppo di intervento, Le verrà anche spiegato come utilizzare una specifica App. Questa servirà a raccogliere ulteriori dati nel periodo intercorrente fra l'incontro iniziale e quello a 12 mesi. Durante questo periodo, Le saranno inviati dei promemoria al fine di ricordarle di rispondere a delle semplici domande riguardanti le sue abitudini. Le sue risposte permetteranno sia di personalizzare i messaggi educativi che riceverà per aiutarla a migliorare il suo stile di vita, sia di valutare l'efficacia di questi interventi educazionali. Inoltre, se durante l'incontro basale si fosse riscontrata la presenza di uno o più fattori di rischio cardiovascolari, quali ad esempio ipertensione, diabete o ipercolesterolemia, le sarà chiesto di inserire, ad intervalli regolari, alcuni dati numerici (esempio: pressione arteriosa, emoglobina glicata, ecc.) che saranno utili per valutare l'andamento di questi fattori di rischio nel tempo e l'efficacia delle strategie educazionali messe in atto.

Dopo 7 anni Lei sarà ricontattato dal suo medico per verificare se nell'arco di questo tempo siano comparsi eventi vascolari maggiori (es infarto miocardico e ictus), o nuove diagnosi di angina e di arteriopatie periferiche, e/o se sia stato ospedalizzato per malattie cardiovascolari.

Studio CV PREVITAL  
Versione 2.0 del 31.05.2021

**Quali sono i rischi e i benefici per chi partecipa allo studio?**

Lo studio non La espone ad alcun tipo di rischio in quanto prevede soltanto l'utilizzo di una semplice App e non implica interventi di carattere invasivo. Anche i prelievi di sangue ai quali sarà sottoposto in occasione dell'incontro iniziale e di quello a 12 mesi, essendo effettuati attraverso una puntura sul dito (prelievo capillare) non La esporranno a rischi aggiuntivi. La partecipazione allo studio potrebbe invece comportare dei benefici. Ad esempio, conoscere meglio i propri fattori di rischio ed avere la possibilità di tenerli sotto controllo in modo più efficiente dovrebbe ridurre la velocità di insorgenza o di progressione delle malattie cardiovascolari in generale, e la probabilità di sviluppare eventi clinici acuti (ad es. un infarto) in particolare.

**Il rifiuto a partecipare allo studio compromette in qualche modo il rapporto con il medico?**

Assolutamente no, la partecipazione allo studio è volontaria e Lei è libero di ritirare il consenso in qualsiasi momento senza che Lei sia richiesta alcuna motivazione. Il rapporto con il suo medico non sarà in alcun modo compromesso.

**La partecipazione è gratuita o è remunerata?**

La partecipazione allo studio è totalmente gratuita e non è previsto alcun compenso.

**Uso dei dati**

I Suoi dati verranno usati in ottemperanza alla normativa vigente in materia di tutela del trattamento dei dati personali. A tal fine, è prevista una specifica informativa che Lei sarà fornita contestualmente alla proposta di adesione allo studio.

**Approvazione dello studio**

Lo studio è stato approvato dal Ministero della Salute, dal Comitato Etico Coordinatore e dai Comitati Etici locali di riferimento per i Medici che partecipano allo studio.

Studio CV PREVITAL  
Versione 2.0 del 31.05.2021

## DICHIARAZIONE DI CONSENSO

### Studio CV PREVITAL Strategie di Prevenzione primaria cardiovascolare nella popolazione italiana

Ho letto e compreso il modulo informativo per il paziente e il mio medico curante ha risposto a tutte le mie domande relative allo studio.

Ho avuto tempo per decidere se partecipare allo studio e sono consapevole che la mia partecipazione è completamente volontaria.

Sono consapevole che posso ritirarmi dallo studio in qualsiasi momento e senza l'obbligo di motivare la mia decisione.

Do, pertanto, il mio consenso a partecipare allo studio CV PREVITAL

**Nome/Cognome del paziente**

**Firma**

**Data**

\_\_\_\_\_

\_\_\_\_\_

\_\_\_\_\_

\_\_\_\_\_

\_\_\_\_\_

\_\_\_\_\_

**Nome/Cognome dello  
sperimentatore responsabile**

**Firma**

**Data**

\_\_\_\_\_

\_\_\_\_\_

\_\_\_\_\_

\_\_\_\_\_

\_\_\_\_\_

\_\_\_\_\_

**Nome/Cognome del testimone**

**Firma**

**Data**

\_\_\_\_\_

\_\_\_\_\_

\_\_\_\_\_

\_\_\_\_\_

\_\_\_\_\_

\_\_\_\_\_

## INFORMATIVA PER IL TRATTAMENTO DEI DATI PERSONALI

### **Titolo dello studio:**

Strategie di prevenzione primaria cardiovascolare nella popolazione italiana – CV PREVITAL

**Promotore:** IRCCS Centro Cardiologico Monzino

### **Categorie di dati oggetto del trattamento**

Lo studio comporta l'acquisizione e l'utilizzo di informazioni considerate "dati personali" (quali: età, sesso, etnia, stato civile, stato socio-economico), incluse informazioni inerenti lo stato di salute, lo stile di vita, la storia familiare, considerate "dati particolari", e come tali sottoposte alla normativa vigente in materia di protezione dei dati personali:

- Regolamento Generale sulla Protezione dei Dati - UE 679/2016
- Codice in Materia di Protezione dei Dati Personali - D.lgs. n° 101/2018
- Regole deontologiche per trattamenti a fini statistici o di ricerca scientifica – 2018
- Provvedimento - 2018, che individua:  
Prescrizioni relative al trattamento dei dati personali effettuato per scopi di ricerca scientifica  
Prescrizioni relative al trattamento dei dati genetici per clinica e ricerca scientifica

### **Finalità del trattamento**

I dati sopra descritti saranno trattati per consentire lo svolgimento dello studio CV PREVITAL e di tutte le relative operazioni ed attività connesse

### **Base giuridica del trattamento**

Il consenso informato costituisce la base giuridica per il trattamento dei Suoi dati per gli scopi descritti nel modulo informativo. In assenza di consenso firmato non potremo utilizzare i Suoi dati per la conduzione e le analisi dello Studio.

Potrà interrompere la Sua partecipazione in qualsiasi momento e senza fornire alcuna motivazione; in tal caso, i Suoi dati saranno trattati come descritto nel modulo informativo dello Studio. Non saranno raccolti ulteriori dati che La riguardano, ferma restando l'utilizzazione di quelli eventualmente già raccolti per determinare, senza alterarli, i risultati della ricerca.

### **Natura del conferimento dei dati**

La partecipazione alla sperimentazione avviene su base volontaria, pertanto, il conferimento dei dati personali è assolutamente volontario, nel senso che Lei potrà decidere di non conferire i Suoi dati personali e, quindi, di non partecipare allo Studio.

### **Modalità di Trattamento dei dati**

Le finalità sopra indicate prevedono lo svolgimento del trattamento dei dati personali mediante strumenti manuali ed informatici con logiche strettamente correlate alle finalità stesse e, comunque, in modo da garantire la sicurezza e la riservatezza dei dati stessi.

I dati raccolti per i fini dello studio CV PREVITAL saranno gestiti in forma codificata.

Il medico che La seguirà nello studio, La identificherà con un codice che non permetterà di risalire direttamente alla Sua identità, se non presso lo studio medico partecipante.

I dati che La riguardano, raccolti nel corso dello studio, ad eccezione del Suo nominativo e il suo telefono, saranno trasmessi al Promotore in qualità di Titolare dei dati e ai Responsabili del trattamento dei dati prima elencati, e dagli stessi registrati, elaborati e conservati. I dati che Lei inserirà tramite la stazione intermodale multifunzione (totem multimediale presente nell'ambulatorio del suo medico) o da remoto (via internet) e i dati che inserirà tramite la App (se il suo medico fa parte del gruppo di intervento), saranno memorizzati in un database cloud e resi disponibili, in forma pseudonimizzata, alla piattaforma informatica della Rete Cardiologica.

Soltanto il medico, il personale responsabile del monitoraggio dello Studio (*Istituto di Ricerche Farmacologiche Mario Negri IRCCS*) e il personale delegato dalle Autorità Competenti per attività di verifica, potranno collegare questo codice al Suo nominativo quando necessario.

### **Ambito di comunicazione dei dati**

La Sua partecipazione allo studio CV PREVITAL implica che, in conformità alla normativa sulle sperimentazioni cliniche dei medicinali, soltanto il personale incaricato delle attività di monitoraggio, il Comitato etico e le autorità sanitarie italiane e straniere potranno conoscere i dati che La riguardano, contenuti anche nella Sua documentazione clinica originale, con modalità tali da garantire la riservatezza della Sua identità.

La diffusione dei dati scientifici risultanti dalle analisi dei dati dello studio CV PREVITAL, potrà avvenire solo in forma anonima e per sole finalità scientifiche. In pratica, i risultati delle ricerche scientifiche, potranno essere presentati in forma aggregata nell'ambito di Convegni o pubblicati su riviste specializzate senza mai permettere la precisa identificazione dei pazienti.

Se previsto dal protocollo, i Suoi dati personali potranno essere trasferiti a Centri esterni per le finalità previste dal protocollo, designati dai Titolari quali "Responsabili del trattamento".

Potrà conoscere l'elenco aggiornato dei Responsabili del Trattamento, inviando una comunicazione al Responsabile della protezione dei dati (DPO) del Promotore.

In linea generale, la informiamo che ai sensi della normativa vigente, le informazioni, potranno essere condivise con altri enti e istituti di ricerca, con associazioni e altri organismi pubblici e privati aventi finalità di ricerca.

Nello specifico, lo studio CV PREVITAL è parte integrante di un più vasto progetto sviluppato con il Ministero della Salute, su indicazione del Parlamento per migliorare le strategie di prevenzione primaria cardiovascolare nella popolazione italiana, che coinvolge, Medici di Medicina Generale (MMG), Farmacie, IRCCS della Rete Cardiovascolare, la Società Italiana per la Salute Digitale e la Telemedicina e la Fondazione Romeo e Enrica Invernizzi.

Pertanto le informazioni dello studio CV PREVITAL potranno essere condivise con altri Istituti o Enti che partecipano al più vasto progetto di ricerca, fatte salve le garanzie dei suoi diritti in materia di protezione dei dati personali.

Qualora dalle indagini effettuate per fini di ricerca in ambito scientifico conseguano informazioni, anche inattese, in grado di arrecare un beneficio concreto e diretto in termini di terapia o di prevenzione o in funzione di consapevoli scelte riproduttive, tali informazioni potranno essere comunicate a terzi su Sua autorizzazione, tranne eccezioni previste dalla normativa vigente.

### **Politica in materia di conservazione dei dati personali**

I dati personali raccolti nell'ambito dello studio CV PREVITAL saranno conservati presso lo studio medico del Suo MMG, il Promotore e le strutture coinvolte nello Studio, per un periodo minimo di 7 anni dopo la conclusione dello Studio o per un periodo più lungo, se necessario, in base ad ulteriori requisiti di legge. Il periodo massimo di conservazione dei dati è di 25 anni dopo la conclusione dello studio.

**Titolare e Responsabile della Protezione dei dati:** Il Promotore che ha commissionato lo studio CV PREVITAL e il suo MMG, in qualità di Titolari del Trattamento, e l'Istituto di Ricerche Farmacologiche Mario Negri IRCCS e il Consorzio Sanità (Co.S.), in qualità di Responsabili del Trattamento, ciascuno per gli ambiti di propria competenza e in accordo alle responsabilità previste dalle norme di Buona Pratica Clinica (D.L. 211/2003), dal Regolamento UE 2016/679 del Parlamento e del Consiglio Europeo relativo alla protezione delle persone fisiche con riguardo al trattamento dei dati personali, nonché alla libera circolazione di tali dati (di seguito GDPR), dal D.lgs. 196/03 integrato dal dall'Autorizzazione generale n.9/2016 al trattamento dei dati personali effettuato a scopi di ricerca scientifica del 15 dicembre 2016 e dalla Delibera del Garante per le "Linee guida per i trattamenti di dati personali nell'ambito delle sperimentazioni cliniche di medicinali" del 24 luglio 2008 e successive modifiche, tratteranno i suoi dati personali, soltanto nella misura in cui sono indispensabili in relazione all'obiettivo dello Studio e per le finalità di seguito indicate.

La informiamo che i Titolari, ai sensi dell'articolo 37 del GDPR EU 2016/679, hanno proceduto ad individuare e nominare il Responsabile della Protezione dei dati (anche "Data Protection Officer" o "DPO"):

Dati di contatto DPO del MMG:

[...]

Dati di contatto DPO del Promotore:

[...]

### **Diritti dell'Interessato**

#### *Diritto di accesso ai dati*

Può chiedere di consultare le informazioni che sono state raccolte su di Lei. Tuttavia, per salvaguardare l'integrità scientifica dello studio, potrebbe non essere possibile accedere ad alcuni dati prima della conclusione dello studio stesso.

*Diritto di rettifica ai dati*

Può richiedere la modifica dei dati che La riguardano, qualora fossero errati o incompleti. Durante la valutazione di tale richiesta, ha il diritto di limitare il trattamento dei dati che La riguardano.

*Diritto di portabilità dei dati*

Può richiedere il trasferimento dei dati che La riguardano a Lei stesso o a qualcun altro in un formato comunemente utilizzato (cartaceo o elettronico).

*Diritto di cancellazione dei dati*

Può ritirare il consenso in qualsiasi momento senza darne motivazione alcuna. Può ritirare il consenso per la partecipazione allo studio e/o ai follow up successivi, anche senza ritirare il consenso per il trattamento dei dati. Qualora cambiasse idea sul trattamento dei Suoi dati, non sarà possibile rimuovere le informazioni personali già elaborate per lo studio prima del Suo ritiro (coperte dal consenso originale). In seguito, al ritiro del consenso al trattamento dei Suoi dati non verrebbero acquisite ulteriori informazioni che La riguardano.

*Diritto di reclamo*

Può presentare un reclamo presso l'autorità incaricata della protezione dei dati:

Garante della privacy, E-mail: [garante@garanteprivacy.it](mailto:garante@garanteprivacy.it) Sito web: <http://www.garanteprivacy.it>

**In merito all'esercizio di tali diritti, potrà rivolgersi direttamente al suo medico di medicina generale o, per il suo tramite, al Responsabile della protezione dei dati (DPO) del Promotore.**

## Definizioni

- Dato personale: qualsiasi informazione riguardante una persona fisica identificata o identificabile («interessato»); si considera identificabile la persona fisica che può essere identificata, direttamente o indirettamente, con particolare riferimento a un identificativo come il nome, un numero di identificazione, dati relativi all'ubicazione, un identificativo online o a uno o più elementi caratteristici della sua identità fisica, fisiologica, genetica, psichica, economica, culturale o sociale.
- Dati particolari: dati personali che rivelino l'origine razziale o etnica, le opinioni politiche, le convinzioni religiose o filosofiche, o l'appartenenza sindacale; i dati genetici, i dati biometrici intesi a identificare in modo univoco una persona fisica, i dati relativi alla salute o alla vita sessuale o all'orientamento sessuale della persona.
- Dati relativi alla salute: i dati personali attinenti alla salute fisica o mentale di una persona fisica, compresa la prestazione di servizi di assistenza sanitaria, che rivelano informazioni relative al suo stato di salute; quali ad esempio i dati relativi ad attività di ricovero, visite specialistiche ambulatoriali, consumo di farmaci e prestazioni di tipo socio-sanitario



**Consenso al trattamento dei dati personali**  
ai sensi del GDPR UE 2016/679

Preso atto dell'informativa di cui all'art. 13 del GDPR UE 2016/679, il sottoscritto \_\_\_\_\_, nato a \_\_\_\_\_, il \_\_\_\_\_, in qualità di interessato

dà il proprio consenso  nega il proprio consenso  
al trattamento dei dati per finalità relative allo studio clinico "Strategie di prevenzione primaria cardiovascolare nella popolazione italiana – CV PREVITAL"

dà il proprio consenso  nega il proprio consenso  
affinché i risultati delle analisi e di eventuali scoperte inattese che emergano durante le attività di sperimentazione siano comunicate a:

- me medesimo
- familiare (Cognome e nome \_\_\_\_\_)
- convivente /coniuge (Cognome e nome \_\_\_\_\_)
- medico di famiglia (Cognome e nome \_\_\_\_\_)

**Nome/Cognome del paziente**

**Firma**

**Data**

\_\_\_\_\_

**Nome/Cognome del Medico di  
Medicina Generale responsabile**

**Firma**

**Data**

\_\_\_\_\_

CV PREVITAL Study Version 2.0 of 31.05.2021

## PATIENT INFORMATION FORM

### CV PREVITAL Study

#### Digital Strategies in Primary Cardiovascular Prevention in the Italian Population

#### Invitation to participate in the CV PREVITAL Study

Dear Madam(s), we invite you to participate in the CV PREVITAL Study.

#### What is the CV PREVITAL Study?

The CV PREVITAL study is a collaborative research conducted by Family Physicians, which takes place nationwide with the aim of improving primary cardiovascular prevention in Italy.

The CV PREVITAL study is promoted by the Ministry of Health, which recognises prevention as the most effective weapon for reducing the occurrence of cardiovascular disease.

#### Why is the CV PREVITAL Study important?

Currently, prevention is the most important intervention strategy to decrease the incidence of cardiovascular diseases such as myocardial infarction and stroke. Identifying at an early stage those at risk of developing these diseases, and adequately informing those concerned on how to adopt 'healthy' lifestyles have proved to be very effective strategies for combating the onset of hypertension, diabetes and hypercholesterolaemia, which together with smoking and obesity represent the main risk factors for the onset of cardiovascular diseases.

In this context, digital technologies are showing great potential in improving public and individual health, as they can be used as tools to support the physician in managing risk factors.

Indeed, in recent years, the term 'mobile-health' or 'm-health' has become increasingly popular, denoting the set of technologies (mobile phones and smartphones, tablets, digital devices) applied in the medical-health field, which are showing great potential in improving public and individual health.

#### Objective of the study

The objective of the study is to evaluate the effectiveness of an m-health intervention in reducing the main cardiovascular risk factors and the long-term occurrence of major cardiovascular diseases. The intervention consists of the use of a smartphone application (App), which will send personalised educational and training messages, and will allow monitoring and self-monitoring of the main cardiovascular risk factors and lifestyles.

#### What the study consists of

The study will involve about 250 Family Physicians, distributed in different regions of Italy, and in total 50,000 subjects will be included.

Your doctor will check that you are eligible to participate in the study and if so, will invite you to join the study by signing the attached consent.

CV PREVITAL Study  
Version 2.0 of 31.05.2021

The CV PREVITAL study is a non-pharmacological randomised clinical trial, where participating physicians will be randomly divided into two groups:

1. control group
2. intervention group

The doctors in the 'control group' will manage their patients according to normal clinical practice (usual care), to the best of currently available knowledge.

The doctors in the 'intervention group', in addition to normal clinical practice, will also follow the patients with the support of an App that participants can download to their smartphones via a dedicated link.

The randomised clinical trial is the most appropriate, scientifically recognised method for evaluating the effectiveness of interventions aimed at modifying a clinical condition. In the case of the present study, the use of the App to improve the control of cardiovascular risk factors.

### **What does joining the CV PREVITAL study entail?**

Should you decide to participate in this study, your doctor will ask you a series of questions aimed at assessing the state of your cardiovascular health. In particular, you will be invited to fill out, with the help of nurses and/or digital tutorials, questionnaires concerning your eating habits, physical activity, smoking habits and psycho-social and behavioural factors. You will also have your total cholesterol, LDL, HDL and glycated haemoglobin levels measured on a drop of blood obtained through a capillary sampling (small prick on the finger). Finally, blood pressure, weight, height and waist circumference measurements will be taken. This will be repeated after 12 months.

Your doctor and nursing staff will support you by implementing all available knowledge to improve your cardiovascular risk profile. If your doctor is part of the intervention group, you will also be taught how to use a specific App. This will be used to collect further data in the period between the initial evaluation and the 12-month evaluation. During this period, reminders will be sent to remind you to answer simple questions about your habits. Your answers will make it possible both to personalise the educational messages you receive to help you improving your lifestyle and to evaluate the effectiveness of these educational interventions. Moreover, if one or more cardiovascular risk factors, such as hypertension, diabetes, or hypercholesterolemia, were found to be present during the baseline evaluation, you will be asked to enter, at regular intervals, some numerical data (e.g. blood pressure, glycated haemoglobin, etc.) which will be useful for assessing the trend of these risk factors over time and the effectiveness of the educational strategies implemented.

After 7 years, you will be contacted again by your doctor to check whether any major vascular events (e.g. myocardial infarction and stroke) or new diagnoses of angina and peripheral arterial disease have occurred during this time, and/or whether you have been hospitalised for cardiovascular diseases.

### **What are the risks and benefits for those participating in the study?**

The study does not expose you to any kind of risk as it involves only the use of a simple App and does not involve any invasive intervention. Even the blood sampling that you will be subjected to in occasion of the initial evaluation and at the 12-month evaluating, being performed through a prick on

CV PREVITAL Study  
Version 2.0 of 31.05.2021

the finger (capillary sampling), will not expose you to any additional risk. On the other hand, participation in the study could bring benefits. For example, knowing your own risk factors better and being able to control them more efficiently should reduce the rate of onset or progression of cardiovascular disease in general, and the likelihood of developing acute clinical events (e.g. a heart attack) in particular.

**Does refusal to participate in the study in any way compromise the relationship with the doctor?**

Absolutely not, participation in the study is voluntary and you are free to withdraw your consent at any time without being asked for a reason. Your relationship with your doctor will not be affected in any way.

**Is participation free or is it remunerated?**

Participation in the study is totally free of charge and there is no fee.

**Use of data**

Your data will be used in accordance with current legislation on the protection of personal data. To this end, a specific information notice will be provided to you together with the proposal to join the study.

**Approval of the study**

The study was approved by the Ministry of Health, the Coordinating Ethics Committee and the relevant local Ethics Committees.

CV PREVITAL Study  
Version 2.0 of 31.05.2021

## DECLARATION OF CONSENT

### CV PREVITAL study Digital Strategies in Primary Cardiovascular Prevention in the Italian Population

I read and understood the patient information form and my attending physician answered all my questions regarding the study.

I have had time to decide whether to participate in the study and I am aware that my participation is completely voluntary.

I am aware that I can withdraw from the study at any time and without having to justify my decision.

I therefore give my consent to participate in the CV PREVITAL study

**Name/Surname of patient**

**Signature**

**Date**

---

---

---

---

---

---

**Name/Surname of the  
responsible investigator**

**Signature**

**Date**

---

---

---

---

---

---

**Name/Surname of witness**

**Signature**

**Date**

---

---

---

---

---

---

## INFORMATION FOR THE PROCESSING OF PERSONAL DATA

### **Title of the study:**

Strategies for primary cardiovascular prevention in the Italian population – CV PREVITAL

**Promoter:** IRCCS Monzino Cardiology Center

### **Categories of data subject to processing**

The study involves the acquisition and use of information considered “personal data” (such as: age, gender, ethnicity, marital status, socio-economic status), including information pertaining to health status, lifestyle, family history, considered “special data”, and as such subject to current data protection regulations:

- Regolamento Generale sulla Protezione dei Dati - UE 679/2016
- Codice in Materia di Protezione dei Dati Personali - D.lgs. n° 101/2018
- Regole deontologiche per trattamenti a fini statistici o di ricerca scientifica – 2018
- Provvedimento - 2018, che individua:
  - Prescrizioni relative al trattamento dei dati personali effettuato per scopi di ricerca scientifica
  - Prescrizioni relative al trattamento dei dati genetici per clinica e ricerca scientifica

### **Purpose of processing**

The data described above will be processed to enable the performance of the CV PREVITAL study and all related operations and activities

### **Legal basis for processing**

Informed consent is the legal basis for processing your data for the purposes described in the information form. Without signed consent, we will not be able to use your data for the conduct and analysis of the Study.

You may discontinue your participation at any time and without giving any reason; in this case, your data will be processed as described in the Study's information form. No further data concerning you will be collected, without prejudice to the use of any data already collected to determine, without altering them, the results of the research.

### **Nature of provision of data**

Participation in the trial is on a voluntary basis, therefore, the provision of personal data is completely voluntary, meaning that you may decide not to provide your personal data and, therefore, not to participate in the Study.

### **Methods of Data Processing**

The above-mentioned purposes involve the conduct of the processing of personal data using manual and computerized tools with logic strictly related to the purposes themselves and, in any case, in such a way as to ensure the security and confidentiality of the data.

Data collected for the purposes of the CV PREVITAL study will be handled in coded form.

The physician who will follow you to the study will identify you with a code that will not allow your identity to be traced directly, except to the participating physician's office.

The data about you collected during the study, with the exception of your name and your phone, will be transmitted to the Promoter as the Data Controller and the Data Processors listed above, and recorded, processed and stored by them. The data that you enter via the multifunctional intermodal station (multimedia totem in your doctor's office) or remotely (via the Internet) and the data that you enter via the App (if your doctor is part of the intervention group), will be stored in a cloud database and made available, in pseudonymized form, to the Cardiology Network IT platform.

Only the physician, the personnel responsible for monitoring the Study (*Istituto di Ricerche Farmacologiche Mario Negri IRCCS*) and the personnel delegated by the Competent Authorities for verification activities will be able to link this code to your name when necessary.

### **Scope of data reporting**

Your participation in the CV PREVITAL study implies that, in accordance with the regulations on clinical trials of medicinal products, only the personnel in charge of monitoring activities, the Ethics Committee and the Italian and foreign health authorities will be able to know the data concerning you, also contained in your original clinical documentation, in such a way as to guarantee the confidentiality of your identity.

Dissemination of scientific data resulting from the analysis of data from the CV PREVITAL study, may be done only anonymously and for scientific purposes only. In practice, the results of scientific research, may be presented in aggregate form at Conferences or published in peer-reviewed journals without ever allowing the precise identification of patients.

If provided for in the protocol, your personal data may be transferred to external Centers for the purposes provided for in the protocol, designated by the Holders as "Data Processors".

You can find out the updated list of Data Processors by sending a communication to the Data Protection Officer (DPO) of the Promoter.

In general, we inform you that in accordance with current regulations, information, may be shared with other research organizations and institutes, associations, and other public and private bodies having research purposes.

Specifically, the CV PREVITAL study is an integral part of a larger project developed with the Ministry of Health at the direction of Parliament to improve primary cardiovascular prevention strategies in the Italian population, involving, General Practitioners (GPs), Pharmacies, Cardiovascular Network IRCCSs, the Italian Society for Digital Health and Telemedicine, and the Romeo and Enrica Invernizzi Foundation.

Therefore, information from the CV PREVITAL study may be shared with other Institutes or Entities participating in the larger research project, subject to the safeguards of his or her data protection rights. If the investigations carried out for scientific research purposes result in information, even unexpected information, capable of providing a concrete and direct benefit in terms of therapy or prevention or as a function of conscious reproductive choices, such information may be disclosed to third parties upon your authorization, except for exceptions provided for in the regulations in force.

### **Policy on the retention of personal data**

Personal data collected as part of the CV PREVITAL study will be retained at the medical office of your GP, the Promoter, and the facilities involved in the Study, for a minimum period of 7 years after

the conclusion of the Study or for a longer period, if necessary, according to additional legal requirements. The maximum data retention period is 25 years after the conclusion of the Study.

**Owner and Data Protection Officer:** The Promoter who commissioned the study CV PREVITAL and its GP, as Data Controllers, and the Istituto di Ricerche Farmacologiche Mario Negri IRCCS and Consorzio Sanità (Co.S.), as Data Processors, each for the areas of their competence and in accordance with the responsibilities provided by the rules of Good Clinical Practice (D. L. 211/2003), by the EU Regulation 2016/679 of the European Parliament and Council on the protection of individuals with regard to the processing of personal data and on the free movement of such data (hereinafter GDPR), by the Legislative Decree 196/03 supplemented by the General Authorization n.9 /2016 to the processing of personal data carried out for the purpose of scientific research of December 15, 2016 and by the Resolution of the Guarantor for “Guidelines for the processing of personal data in the context of clinical trials of medicinal products” of July 24, 2008 and subsequent amendments, will process your personal data, only to the extent that they are indispensable in relation to the objective of the Study and for the purposes set out below.

We inform you that the Data Controllers, in accordance with Article 37 of the GDPR EU 2016/679, have proceeded to identify and appoint a Data Protection Officer (also “Data Protection Officer” or “DPO”):

MMG DPO contact details:

[...]

Promoter's DPO contact details:

[...]

## **Rights of the Interested Party**

### *Right of access to data*

You may ask to see the information that has been collected about you. However, in order to safeguard the scientific integrity of the study, it may not be possible to access some data before the conclusion of the study.

### *Right to rectification of data*

You may request that data concerning you be amended if it is incorrect or incomplete. While such a request is being considered, you have the right to restrict the processing of data about you.

### *Right to data portability*



You can request the transfer of data about you to yourself or someone else in a commonly used format (paper or electronic).

#### *Right to cancel data*

May withdraw consent at any time without giving any reason. You may withdraw consent for participation in the study and/or subsequent follow-ups, even without withdrawing consent for data processing. Should you change your mind about processing your data, it will not be possible to remove the personal information already processed for the study before your withdrawal (covered by the original consent). Thereafter, upon withdrawal of consent to process your data, no further information about you would be acquired.

#### *Right of complaint*

Can file a complaint with the data protection authority:

Privacy Guarantor, E-mail: [garante@garanteprivacy.it](mailto:garante@garanteprivacy.it) Web site: <http://www.garanteprivacy.it>

**Regarding the exercise of these rights, you may contact your general practitioner directly or, through him or her, the Promoter's Data Protection Officer (DPO).**

#### Definitions

- Personal data means any information relating to an identified or identifiable natural person (“data subject”); an identifiable person is one who can be identified, directly or indirectly, by reference in particular to an identifier such as a name, an identification number, location data, an online identifier, or to one or more features of his or her physical, physiological, genetic, mental, economic, cultural or social identity.
- Special data: personal data revealing racial or ethnic origin, political opinions, religious or philosophical beliefs, or trade union membership; genetic data, biometric data intended to uniquely identify a natural person, data relating to a person's health or sex life or sexual orientation.
- Health-related data: personal data pertaining to a natural person's physical or mental health, including the provision of health care services, that reveal information related to his or her health status; such as data related to hospitalization activities, outpatient specialist visits, drug consumption, and social and health services

**Consent to the processing of personal data**  
in accordance with GDPR EU 2016/679

Having acknowledged the information referred to in Article 13 of the GDPR EU 2016/679, I, the undersigned \_\_\_\_\_, born in \_\_\_\_\_, date \_\_\_\_\_, as the person concerned

gives consent

denies consent

to the processing of data for purposes related to the clinical study “Primary cardiovascular prevention strategies in the Italian population – CV PREVITAL”

gives consent

denies consent

so that the results of analyses and any unexpected findings that emerge during experimental activities are communicated to:

myself

family member (Surname and name \_\_\_\_\_)

cohabitant /spouse (Surname and name \_\_\_\_\_)

general practitioner (Surname and name \_\_\_\_\_)

**Patient Name/Surname**

**Signature**

**Date**

\_\_\_\_\_  
\_\_\_\_\_  
\_\_\_\_\_

**Name/Surname of the Physician of  
General Practitioner in charge**

**Signature**

**Date**

\_\_\_\_\_  
\_\_\_\_\_  
\_\_\_\_\_
