# Supplementary material for: Rationale and design of the CV-PREVITAL study: an Italian multiple cohort randomised controlled trial investigating innovative digital strategies in primary cardiovascular prevention
Source: PubMed Central journal article supplement — BMJ Open. 2023 Jul 14;13(7):e072040. doi: 10.1136/bmjopen-2023-072040 (PMC10351259; doi:10.1136/bmjopen-2023-072040), 2023-07-14
Supplement: bmjopen-2023-072040supp004.pdf [file bmjopen-2023-072040supp004.pdf]

**Online Supplemental file 4. SPIRIT Item 13: Participant timeline**

| <b>TIMEPOINT</b>                                                                                                                                                                                                                                                                                                                                                                                                                                                                                                                                                                                                                                                                                                                                                                                                                                                                                                                                                                                                                                                                                                                                                     | <b>T0<br/>baseline</b> | <b>T1<br/>month 12</b> | <b>T2<br/>year 7</b> |
|----------------------------------------------------------------------------------------------------------------------------------------------------------------------------------------------------------------------------------------------------------------------------------------------------------------------------------------------------------------------------------------------------------------------------------------------------------------------------------------------------------------------------------------------------------------------------------------------------------------------------------------------------------------------------------------------------------------------------------------------------------------------------------------------------------------------------------------------------------------------------------------------------------------------------------------------------------------------------------------------------------------------------------------------------------------------------------------------------------------------------------------------------------------------|------------------------|------------------------|----------------------|
| Eligibility screen<br>Informed consent<br>Allocation                                                                                                                                                                                                                                                                                                                                                                                                                                                                                                                                                                                                                                                                                                                                                                                                                                                                                                                                                                                                                                                                                                                 | √                      |                        |                      |
| Administration of self-report questionnaires covering the following areas:<br>1. family and personal history of diseases (cardio- and cerebrovascular disease; metabolic disease)<br>2. ethnicity, socio-economic status and marital status<br>3. smoking habits<br>4. alcohol consumption (PREDIMED questionnaire <sup>8</sup> )<br>5. adherence to Mediterranean diet (PREDIMED questionnaire <sup>8</sup> and Moli-Sani questionnaire—an adaptation of the MEDAS questionnaire <sup>9</sup> )<br>6. salt consumption (MiniSal questionnaire <sup>10</sup> )<br>7. physical activity (IPAQ—International Physical Activity Questionnaire <sup>11</sup> )<br>8. personal history of sleep disorder and sleep quality (PSQI—Pittsburgh Sleep Quality Index <sup>12</sup> )<br>9. psycho-behavioral factors:<br>9.1 perceived stress (PSS—Perceived Stress Scale)<br>9.2 anxiety and depression (PHQ 4—Patient Health Questionnaire 4)<br>9.3 self-efficacy (GSE—General Self-Efficacy Scale)<br>9.4 locus of control (Multidimensional Health Locus of Control Scale)<br>9.5 risk propensity (RPS—Risk Propensity Scale)<br>10. personal history of COVID-19 disease | √                      | √                      |                      |
| Measurement of systolic and diastolic blood pressure                                                                                                                                                                                                                                                                                                                                                                                                                                                                                                                                                                                                                                                                                                                                                                                                                                                                                                                                                                                                                                                                                                                 | √                      | √                      |                      |
| Measurement of weight, height, waist circumference                                                                                                                                                                                                                                                                                                                                                                                                                                                                                                                                                                                                                                                                                                                                                                                                                                                                                                                                                                                                                                                                                                                   | √                      | √                      |                      |
| Assessment of total cholesterol, HDL-C, triglycerides, calculated LDL-C, glycated hemoglobin                                                                                                                                                                                                                                                                                                                                                                                                                                                                                                                                                                                                                                                                                                                                                                                                                                                                                                                                                                                                                                                                         | √                      | √                      |                      |
| Cardiovascular risk score calculation                                                                                                                                                                                                                                                                                                                                                                                                                                                                                                                                                                                                                                                                                                                                                                                                                                                                                                                                                                                                                                                                                                                                | √                      | √                      |                      |
| App delivery (intervention group only)                                                                                                                                                                                                                                                                                                                                                                                                                                                                                                                                                                                                                                                                                                                                                                                                                                                                                                                                                                                                                                                                                                                               | √                      |                        |                      |
| Collection of data on occurrence of cardiovascular events                                                                                                                                                                                                                                                                                                                                                                                                                                                                                                                                                                                                                                                                                                                                                                                                                                                                                                                                                                                                                                                                                                            |                        | √                      | √                    |
